# Supplementary material for: Carbonic Anhydrase Inhibitors Induce Ferroptosis through Inhibition of AKT/FTH1 Signaling in Ewing Sarcoma Tumor Cells
Source: MDPI journal article supplement (doi:10.3390/cancers15215225), 2023-10-31
Supplement: s1 [file s1]

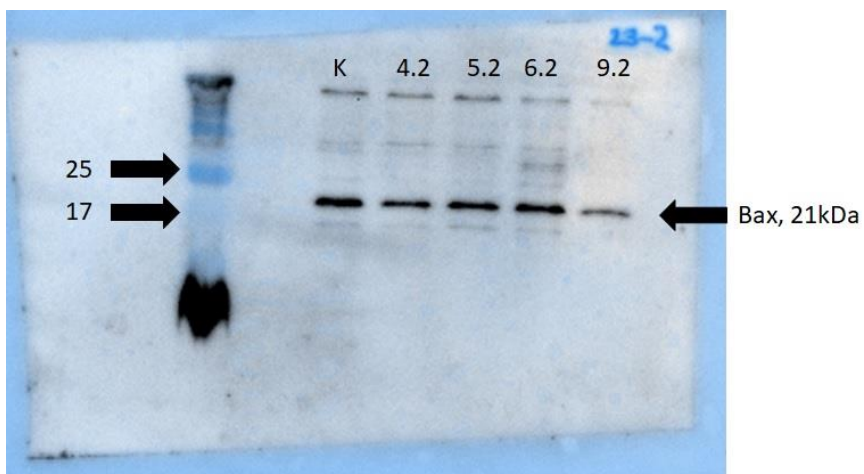

Мембрана 23-9, результат  
14.07.  
ATG5, FNab00678, 50-55 kDa

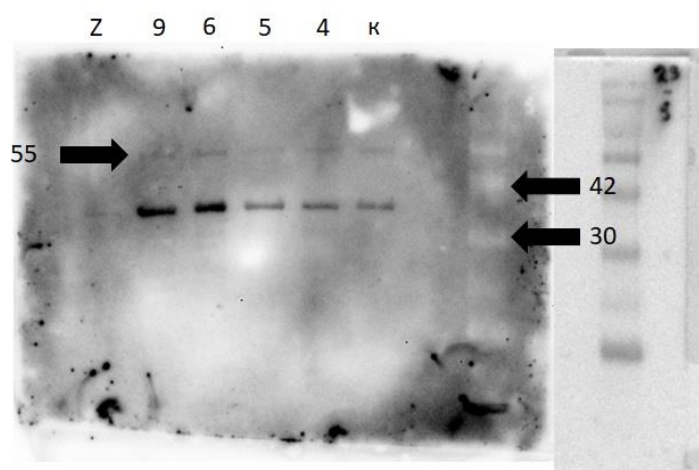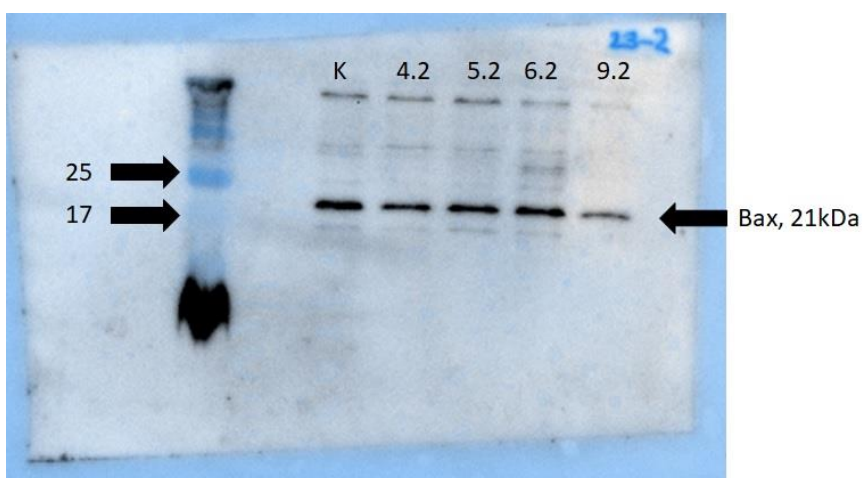

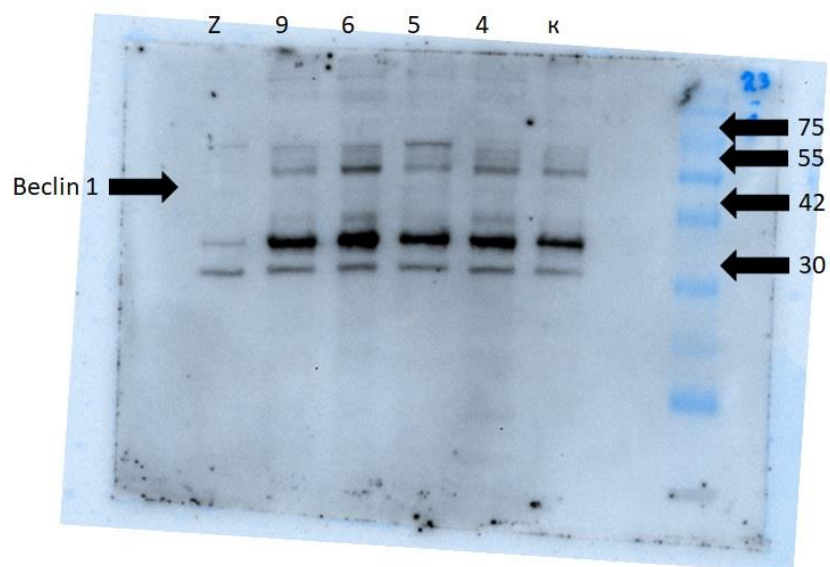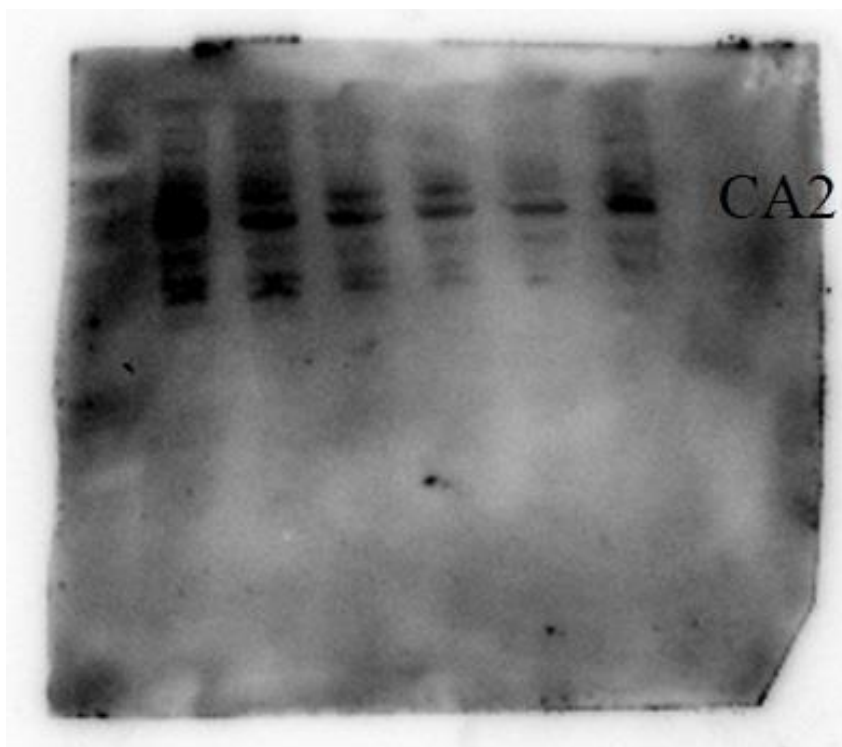

Мембрана 23-9, результат 13.07.  
Cathepsin B, FNab10389, 31/25 kDa

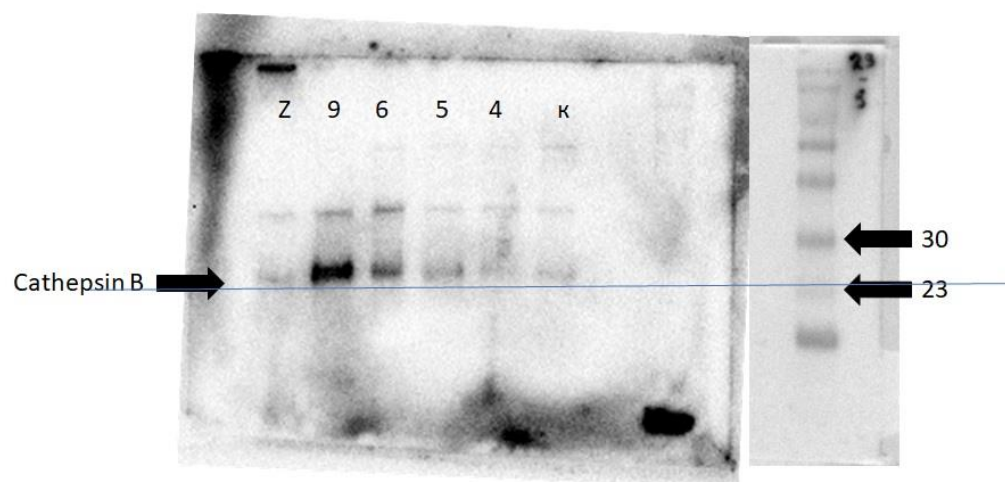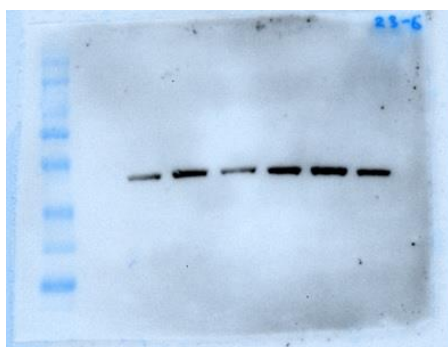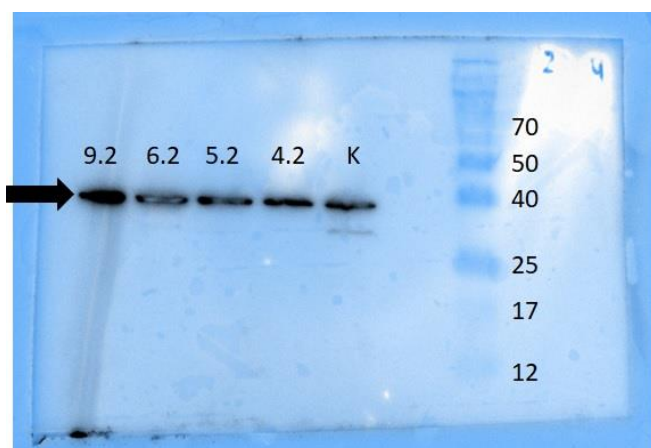

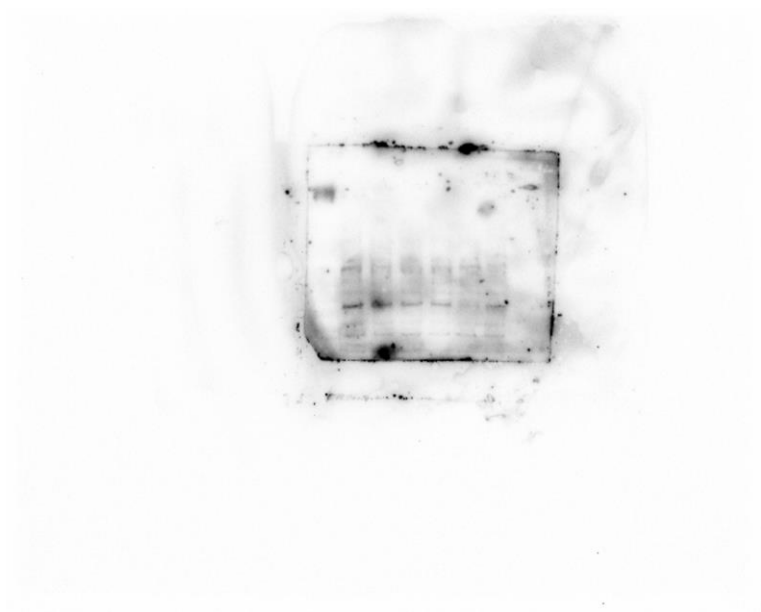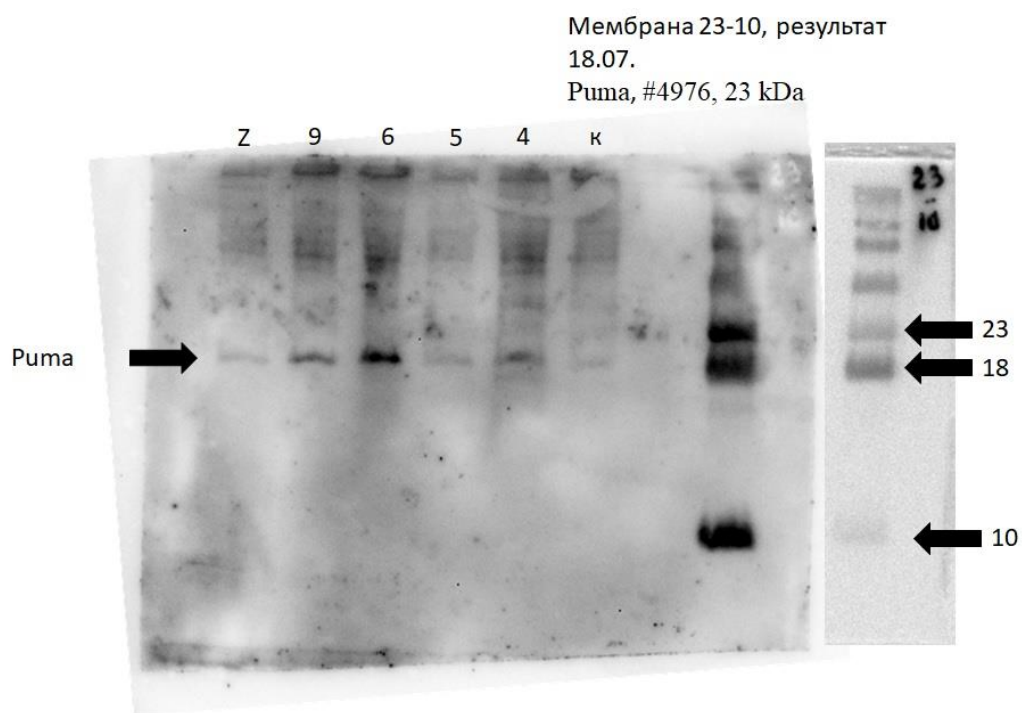

**Figure S4:** The original blots for Figure 3.

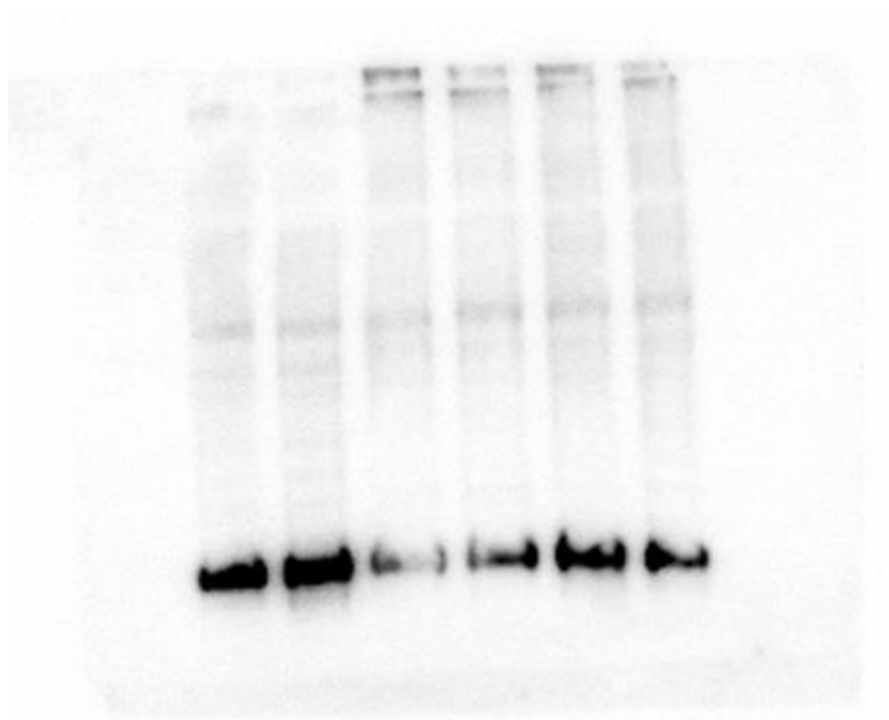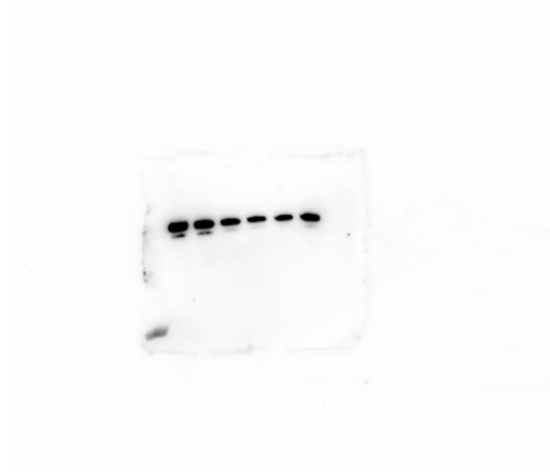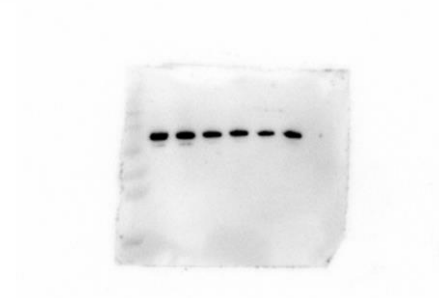

**Figure S5:** The original blots for Figure 4.
