# Supplementary material for: Carbonic Anhydrase Inhibitors Induce Ferroptosis through Inhibition of AKT/FTH1 Signaling in Ewing Sarcoma Tumor Cells
Source: MDPI journal article supplement (doi:10.3390/cancers15215225), 2023-10-31
Supplement: s1 [file s1]

**Table S1.** Structure and Ki of several inhibitors against hCAI, hCAII, hCA IX and hCAXII.

| ID   | Structure                                                                            | Ki, nM |        |        |         |
|------|--------------------------------------------------------------------------------------|--------|--------|--------|---------|
|      |                                                                                      | hCA I  | hCA II | hCA IX | hCA XII |
| Inh1 | 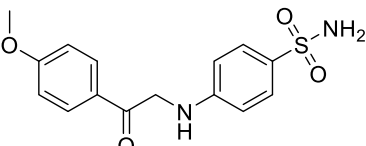    | 124.50 | 38.60  | 10.10  | 81.70   |
| Inh2 |    | 202.30 | 91.60  | 6.40   | 49.20   |
| Inh3 |   | 62.00  | 36.90  | 9.50   | 24.90   |
| Inh4 |   | 82.80  | 0.38   | 0.88   | 9.40    |
| Inh5 |   | 69.40  | 0.74   | 0.77   | 7.80    |
| Inh6 |   | 48.00  | 0.30   | 0.44   | 8.20    |
| Inh7 |  | 88.20  | 0.44   | 0.60   | 8.50    |

|       |                                                                                   |       |      |      |       |
|-------|-----------------------------------------------------------------------------------|-------|------|------|-------|
| Inh7  | 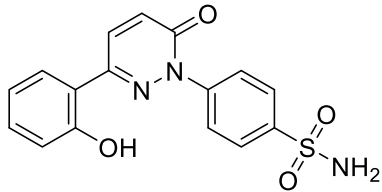 | 84.10 | 0.62 | 0.46 | 9.30  |
| Inh9  |  | 89.00 | 0.07 | 0.58 | 36.00 |
| Inh10 |  | 95.10 | 0.09 | 0.67 | 9.40  |

**Table S2.** List of genes most differently regulated in Alive vs nonalive ES' patient tumor samples (GEO-based dataset GSE63155. Spearman correlation p values obtained in correlation between 200 cellular genes and CAII mRNA expression in ES patient tumor tissue. The results are significant for genes with p value less than 0.05 (Genes are selected in bold).

| GENE           | p value  |
|----------------|----------|
| <b>PLVAP</b>   | 0.000112 |
| <b>KDR</b>     | 0.000133 |
| <b>RFTN1</b>   | 0.000259 |
| <b>PLXNA2</b>  | 0.000305 |
| <b>FGD5</b>    | 0.000358 |
| <b>RASGRP3</b> | 0.00042  |
| <b>DLL4</b>    | 0.000531 |
| <b>PLXNA2</b>  | 0.000779 |
| <b>PLEKHO2</b> | 0.001216 |
| <b>GPR116</b>  | 0.001307 |
| <b>PTPRB</b>   | 0.001405 |
| <b>ST8SIA4</b> | 0.001405 |
| <b>TM4SF18</b> | 0.001405 |
| <b>BMP8A</b>   | 0.001405 |
| <b>CXorf36</b> | 0.001509 |
| <b>CD34</b>    | 0.001509 |
| <b>GUCY1B3</b> | 0.001509 |
| <b>HPCAL1</b>  | 0.001621 |
| <b>CD93</b>    | 0.001621 |
| <b>VEGFC</b>   | 0.00174  |
| <b>RAB27B</b>  | 0.001866 |
| <b>ESAM</b>    | 0.002001 |
| <b>COL4A2</b>  | 0.002001 |
| <b>ADAMTS9</b> | 0.002145 |
| <b>STC1</b>    | 0.002298 |
| <b>ENG</b>     | 0.002635 |
| <b>GIMAP8</b>  | 0.002635 |

|          |          |
|----------|----------|
| ITGA9    | 0.002819 |
| A2M      | 0.003015 |
| MYCT1    | 0.003444 |
| CDH5     | 0.003678 |
| MMRN2    | 0.004191 |
| ST3GAL6  | 0.004191 |
| ROBO4    | 0.00447  |
| INSIG1   | 0.00447  |
| TSPAN15  | 0.004766 |
| HEY2     | 0.004766 |
| CD68     | 0.005079 |
| TGFBR2   | 0.005761 |
| SOX13    | 0.005761 |
| CD276    | 0.006131 |
| PCDH12   | 0.006131 |
| HCLS1    | 0.006131 |
| ARAP3    | 0.006936 |
| PDGFB    | 0.006936 |
| TP53I11  | 0.007833 |
| RUNX1T1  | 0.008318 |
| FILIP1   | 0.008318 |
| PEA15    | 0.00883  |
| GRB10    | 0.009369 |
| LPL      | 0.009937 |
| RAPGEF5  | 0.009937 |
| ANPEP    | 0.009937 |
| SPP1     | 0.009937 |
| GIMAP6   | 0.009937 |
| NCEH1    | 0.009937 |
| CD200    | 0.010534 |
| LYN      | 0.011162 |
| TIE1     | 0.011162 |
| LAPTM5   | 0.012518 |
| KITLG    | 0.012518 |
| CCR1     | 0.013247 |
| ELMO1    | 0.013247 |
| TMEM8A   | 0.013247 |
| PGF      | 0.014013 |
| FLT4     | 0.014013 |
| PODXL    | 0.014817 |
| RASGRF2  | 0.014817 |
| TMEM204  | 0.01566  |
| PRSS23   | 0.01566  |
| RNF128   | 0.016544 |
| SH2D3C   | 0.017471 |
| DCBLD1   | 0.017471 |
| PPIC     | 0.017471 |
| BEST1    | 0.017471 |
| GUCY1A3  | 0.018441 |
| PLEK     | 0.018441 |
| EMCN     | 0.018441 |
| CLEC14A  | 0.018441 |
| ENC1     | 0.019457 |
| TMTC2    | 0.02052  |
| ADAM9    | 0.021631 |
| C10orf10 | 0.022794 |
| CFI      | 0.024008 |

|                 |          |
|-----------------|----------|
| <b>APLNR</b>    | 0.024008 |
| <b>KYNU</b>     | 0.024008 |
| <b>PRKD1</b>    | 0.025276 |
| <b>MFNG</b>     | 0.0266   |
| <b>TYROBP</b>   | 0.027982 |
| <b>MCTP1</b>    | 0.029423 |
| <b>PPARG</b>    | 0.029423 |
| <b>SLC29A1</b>  | 0.030924 |
| <b>EPB41L4A</b> | 0.030924 |
| <b>TMEM119</b>  | 0.032489 |
| <b>GALNTL4</b>  | 0.032489 |
| <b>GLT25D1</b>  | 0.032489 |
| <b>TSPAN18</b>  | 0.032489 |
| <b>LYVE1</b>    | 0.032489 |
| <b>SKAP2</b>    | 0.034118 |
| <b>ENTPD1</b>   | 0.034118 |
| <b>SLC5A4</b>   | 0.035814 |
| <b>COL15A1</b>  | 0.035814 |
| <b>NAV3</b>     | 0.037579 |
| <b>NOSTRIN</b>  | 0.039413 |
| <b>AOC3</b>     | 0.04132  |
| <b>DDIT3</b>    | 0.04132  |
| <b>IL6</b>      | 0.043301 |
| <b>SEMA4C</b>   | 0.043301 |
| <b>GRAP</b>     | 0.043301 |
| <b>CCL18</b>    | 0.045359 |
| <b>RGS16</b>    | 0.047494 |
| <b>RPS6KA2</b>  | 0.049708 |
| <b>VCAM1</b>    | 0.049708 |
| <b>KCTD12</b>   | 0.049708 |
| <b>MCC</b>      | 0.049708 |
| <b>ARRB1</b>    | 0.049708 |
| <b>ADAMTS12</b> | 0.054385 |
| <b>STAB1</b>    | 0.054385 |
| <b>TLR4</b>     | 0.054385 |
| <b>GPM6B</b>    | 0.05685  |
| <b>ICA1</b>     | 0.05685  |
| <b>C10orf11</b> | 0.05685  |
| <b>VWF</b>      | 0.062044 |
| <b>CD14</b>     | 0.062044 |
| <b>HSPA6</b>    | 0.064776 |
| <b>TMEM185A</b> | 0.064776 |
| <b>PCDH1</b>    | 0.064776 |
| <b>ABCB4</b>    | 0.0676   |
| <b>LFNG</b>     | 0.070519 |
| <b>CTH</b>      | 0.072008 |
| <b>APOL4</b>    | 0.079858 |
| <b>FAP</b>      | 0.079858 |
| <b>NDST1</b>    | 0.08317  |
| <b>STEAP4</b>   | 0.086585 |
| <b>GALNT14</b>  | 0.090103 |
| <b>C2</b>       | 0.090103 |
| <b>CHN1</b>     | 0.097456 |
| <b>ACVRL1</b>   | 0.109297 |
| <b>VPREB3</b>   | 0.115584 |
| <b>RASSF2</b>   | 0.117745 |
| <b>TNFSF10</b>  | 0.117745 |

|            |          |
|------------|----------|
| DOCK2      | 0.122138 |
| KLF7       | 0.122138 |
| TDO2       | 0.122138 |
| CDH2       | 0.126644 |
| LRP11      | 0.136002 |
| ANO2       | 0.136002 |
| LAIR1      | 0.140854 |
| ZNF238     | 0.150907 |
| TTYH3      | 0.156108 |
| FXYD5      | 0.156108 |
| C7orf53    | 0.161426 |
| CTSC       | 0.166861 |
| ANKDD1A    | 0.172412 |
| ICAM1      | 0.183864 |
| HMGB3      | 0.189764 |
| RAPGEF3    | 0.22097  |
| KIF21B     | 0.227546 |
| DCLK1      | 0.241024 |
| ST6GALNAC3 | 0.241024 |
| DOCK11     | 0.254924 |
| C1GALT1    | 0.254924 |
| FAM65A     | 0.276534 |
| NLN        | 0.283932 |
| MRAS       | 0.299006 |
| CDC42EP1   | 0.299006 |
| NBPF3      | 0.314434 |
| HDAC7      | 0.322273 |
| ENTPD6     | 0.330192 |
| WWC1       | 0.354397 |
| FLJ42220   | 0.396032 |
| MTSS1      | 0.464987 |
| PBLD       | 0.473726 |
| PDE2A      | 0.491236 |
| EMR2       | 0.535013 |
| OR13C9     | 0.552435 |
| C21orf122  | 0.578369 |
| FLJ39653   | 0.653743 |
| NFASC      | 0.669808 |
| OR51B4     | 0.677727 |
| TMEM220    | 0.677727 |
| PPM1F      | 0.700994 |
| OR52H1     | 0.723466 |
| ZNF862     | 0.737972 |
| FBXO15     | 0.737972 |
| APOBEC3F   | 0.758976 |
| RIBC1      | 0.838574 |
| C4orf42    | 0.854178 |
| FLJ20464   | 0.854178 |
| GRM2       | 0.877862 |
| CBLN3      | 0.929481 |
| HEJ1       | 0.937956 |
| NKAIN1     | 0.937956 |
| TET1       | 0.950292 |
| GSTM2      | 0.954641 |
| RNF32      | 0.962421 |
| ZNF839     | 0.969076 |
| C14orf148  | 0.972018 |

|          |          |
|----------|----------|
| ZMYND17  | 0.972018 |
| FLJ40852 | 0.982529 |
| ZNF793   | 0.999221 |

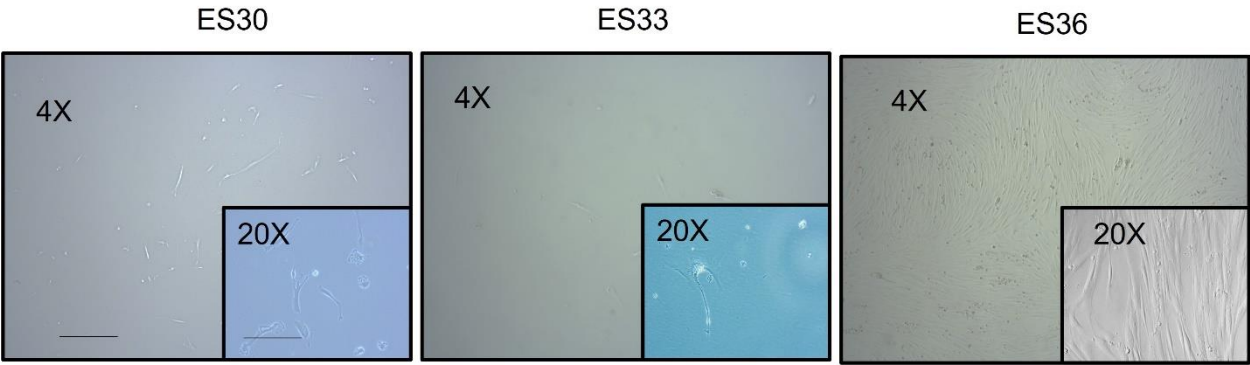

**Figure S1.** Microscopic analysis of Ewing sarcoma primary cultures ES36, ES33 and ES30. Magnification 100 and 200, Scale 50 and 100µm.

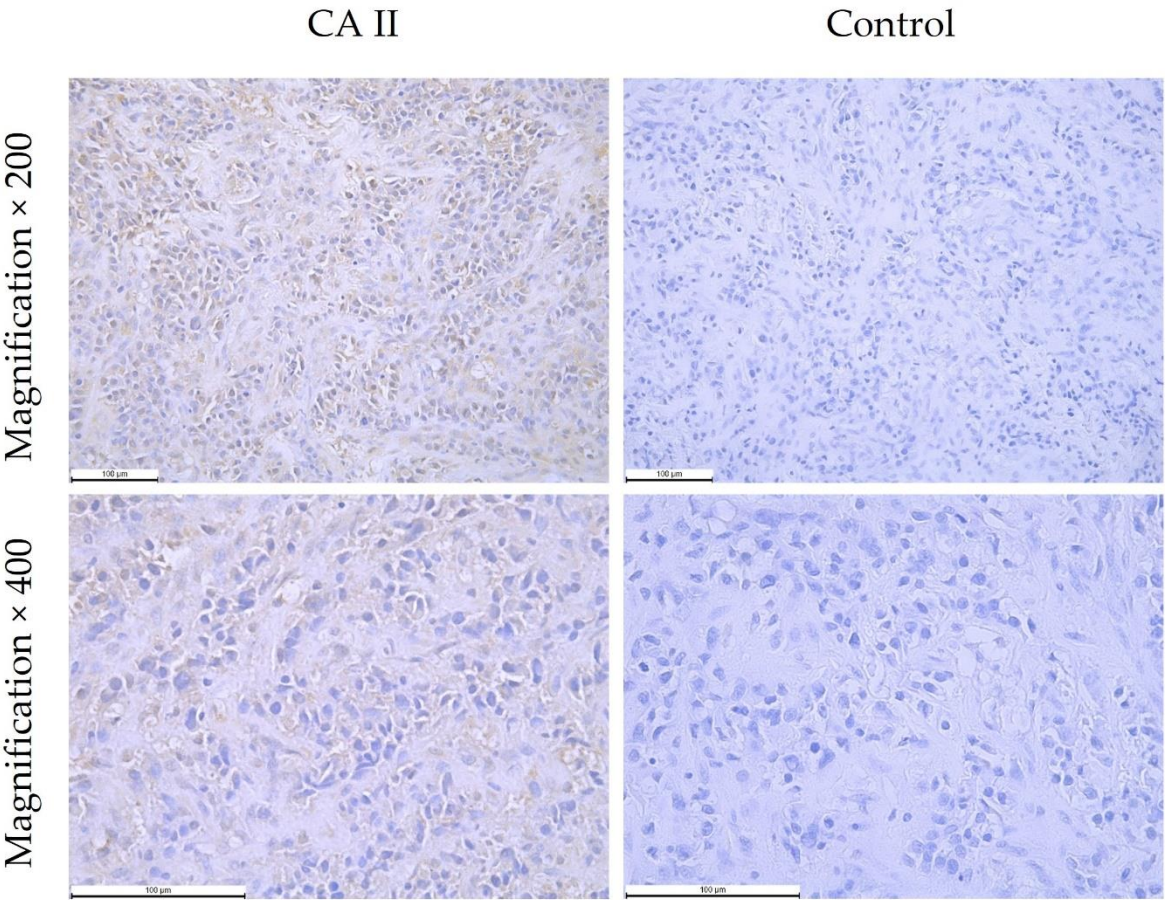

**Figure S2.** Detection of Carbonic anhydrase type II in the Ewing sarcoma tumor tissue. Slight focal background non-specific staining of stroma and singular erythrocytes. Absence of nuclear or cytoplasmic expression of CA II in cancer cells is detected. Magnification x200 and x400.

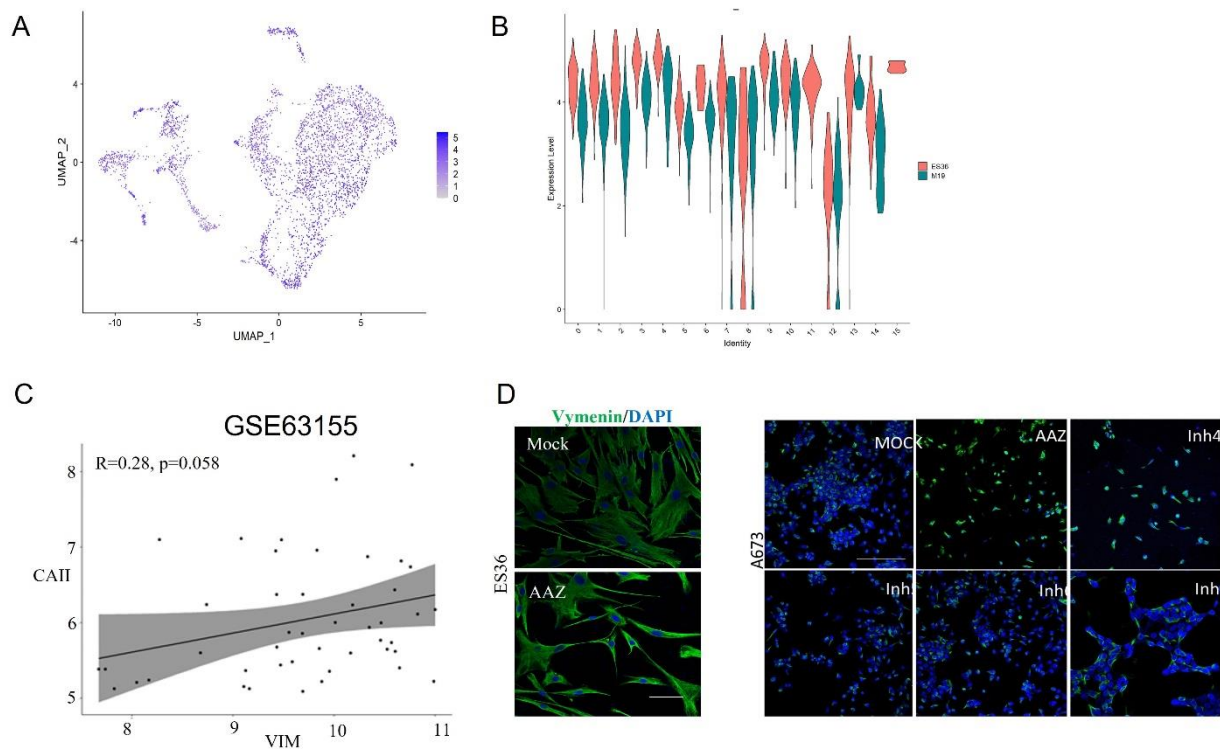

**Figure S3. CA II inhibition manifests vimentin reduction in ES sarcoma cells.** A) UMAP illustration of cell clustering for vimentin (VIM) expression using dataset (Yakushov *S et al*, 2022); B) Violin clustering shows distribution of vimentin in ES36 primary cellular culture and embryonic fibroblasts M19. Vimentin expression is enriched in cluster 11 of ES36 cells; C) Pearson correlation between CA II and vimentin expression in ES primary tissue. Correlation was done using GSE63155 dataset.  $R^2=0.28$ ; Representative immunofluorescence analysis of vimentin expression during AAZ and Inh4, Inh5, Inh6 and Inh9 treatment of ES36, primary Ewing sarcoma culture and model A673 tumor cells. Nucleus were counterstain with DAPI. Detection of Vimentin was conducted using anti-vimentin antibodies following AlexaFluor 488-labeled anti rabbit secondary antibodies. Images were collected 100x magnification, scale 50  $\mu$ m.
